## 1 **Concentration matters: different stomatal CO<sub>2</sub>-responses at sub-ambient and above-** 2 **ambient CO<sub>2</sub> levels**

3 Hanna Hõrak\*, Kaspar Koolmeister\*, Ebe Merilo, Hannes Kollist

4 *Author affiliation: University of Tartu, Institute of Technology, Nooruse 1, 50411, Tartu,*  
5 *Estonia*

6 \*These authors contributed equally

7 Corresponding author contact: Hanna Hõrak, [hanna.horak@ut.ee](mailto:hanna.horak@ut.ee)

### 8 **Abstract**

9 Stomatal pores, formed of paired guard cells, mediate CO<sub>2</sub> uptake for photosynthesis and water  
10 loss via transpiration in plants. Globally rising atmospheric CO<sub>2</sub> concentration triggers stomatal  
11 closure, contributing to increased leaf temperature and reduced nutrient uptake due to lower  
12 transpiration rate<sup>1</sup>. Hence, it is important to understand the signalling pathways that control  
13 elevated CO<sub>2</sub>-induced stomatal closure to identify targets for breeding climate-ready crops.  
14 CO<sub>2</sub>-induced stomatal closure can be studied by increasing CO<sub>2</sub> concentration from ambient to  
15 above-ambient concentrations<sup>2,3</sup>, or elevation of CO<sub>2</sub> levels from sub-ambient to above-  
16 ambient<sup>4,5</sup>. Previous experiments comparing ferns with angiosperms suggested that stomatal  
17 responses to CO<sub>2</sub> may be different, when changing CO<sub>2</sub> levels in the sub-ambient or above-  
18 ambient ranges<sup>3,6</sup>. Here, we set out to test this by comparing CO<sub>2</sub>-induced stomatal closure in  
19 key guard cell signalling mutants in response to CO<sub>2</sub> elevation from 100 to 400 ppm or 400 to  
20 800 ppm. We show that signalling components that contribute to CO<sub>2</sub>-induced stomatal closure  
21 are different in the sub-ambient and above-ambient CO<sub>2</sub> levels, with guard cell slow-type anion  
22 channel SLAC1 involved mainly in above-ambient CO<sub>2</sub>-induced stomatal closure.

23 Stomata open in response to reduced CO<sub>2</sub> concentration and close in response to elevated CO<sub>2</sub>  
24 levels to balance photosynthetic CO<sub>2</sub> uptake and water loss via transpiration. The drought-  
25 inducible plant hormone abscisic acid (ABA) is a key regulator of stomatal closure. The ABA-  
26 induced signalling cascade in stomatal guard cells is triggered by the binding of ABA to its  
27 receptors, the PYR/PYL/RCAR proteins<sup>7,8</sup>, that then form ternary complexes with negative  
28 regulators of ABA signalling, the protein phosphatases of group 2C (PP2C)<sup>9</sup>. In the absence of  
29 ABA, PP2Cs suppress the activation of positive regulators of ABA signalling, the protein  
30 kinase OST1<sup>10-13</sup> and the leucine-rich receptor-like pseudokinase GHR1<sup>14,15</sup>. In the presence of  
31 ABA, PP2Cs are inactivated, OST1 and GHR1 are activated and trigger anion efflux through  
32 the central guard cell slow-type anion channel SLAC1<sup>12,13,16-18</sup>. Thus, the activation of slow-  
33 type anion channel SLAC1 is the crucial step for effective ABA-induced stomatal closure.

34 Stomatal closure induced by elevated CO<sub>2</sub> concentration has remained less well understood.  
35 Similar to ABA, the activation of SLAC1 is required for stomatal closure in response to  
36 CO<sub>2</sub><sup>16,18</sup>. Mutations in genes coding for ABA signal transduction pathway components, such as  
37 the ABA receptors<sup>5,19,20</sup>, PP2C phosphatases<sup>19</sup>, and SLAC1-activating proteins OST1<sup>21</sup> and  
38 GHR1<sup>15,22</sup>, have also been shown to result in impaired CO<sub>2</sub>-induced stomatal closure. These

39 data indicate that the ABA signal transduction pathway contributes to CO<sub>2</sub>-induced stomatal  
40 closure.

41 Nevertheless, some signalling components are involved in stomatal response to CO<sub>2</sub> but not  
42 ABA. Plants deficient in the function of the carbonic anhydrases CA1 and CA4<sup>23</sup>, the mitogen-  
43 activated protein kinase MPK12<sup>24</sup> and the kinase HT1<sup>22,25,26</sup> all have impaired CO<sub>2</sub>-responses  
44 but close stomata in response to ABA. Recently, MPK12 and a highly similar mitogen-activated  
45 protein kinase, MPK4, were shown to inhibit the activity of the HT1 kinase which in turn  
46 influenced activation of the SLAC1 anion channel by OST1 and GHR1<sup>22,24,27</sup>. This indicates  
47 the presence of a CO<sub>2</sub>-specific branch of guard cell signal transduction pathways that is not  
48 required for ABA responses.

49 To understand the molecular mechanisms of CO<sub>2</sub>-induced stomatal closure, it is important to  
50 define, what we mean by stomatal response to CO<sub>2</sub>. Experiments assessing CO<sub>2</sub>-induced  
51 stomatal closure have been carried out in different ways. In some studies, CO<sub>2</sub>-induced stomatal  
52 closure is defined as a process that occurs, when CO<sub>2</sub> concentration is increased from ambient  
53 to above-ambient levels<sup>2,3</sup>. In others, a change from sub-ambient to above-ambient CO<sub>2</sub>  
54 concentration is used to trigger CO<sub>2</sub>-induced stomatal closure<sup>4,5</sup>. Data from previous studies  
55 comparing CO<sub>2</sub>-responses in ferns and angiosperms suggests that stomatal responses to CO<sub>2</sub>  
56 are different, when changing CO<sub>2</sub> levels in the sub-ambient or above-ambient ranges<sup>3,6</sup>. Thus,  
57 to understand stomatal regulation by CO<sub>2</sub>, it is important to clarify, what do we talk about, when  
58 we talk about stomatal response to CO<sub>2</sub>. Whether the underlying molecular mechanisms of  
59 stomatal closure caused by elevation of CO<sub>2</sub> concentration in the sub-ambient and above-  
60 ambient concentration ranges are different, has not been addressed.

61 We analysed stomatal responses to CO<sub>2</sub> in the sub-ambient and above-ambient concentration  
62 ranges in the model plant *Arabidopsis thaliana* to clarify whether these responses are controlled  
63 by the same regulators or display distinct underlying mechanisms. To this end, we used two  
64 types of experimental setups (Figure 1). In both types of experiments, we first reduced CO<sub>2</sub>-  
65 levels from ambient 400 to 100 ppm to induce stomatal opening. Subsequently, CO<sub>2</sub> was either  
66 elevated from 100 to 400 ppm, and then from 400 to 800 ppm (Figure 1a), or alternatively  
67 directly from 100 to 800 ppm (Figure 1b). This approach allowed us to analyse three types of  
68 CO<sub>2</sub>-induced stomatal closure: transition from 100 to 400 ppm (from here on referred to as 100-  
69 400), from 400 to 800 ppm (400-800), and from 100 to 800 ppm (100-800) of CO<sub>2</sub>. Reaction  
70 kinetics of these responses were clearly different for wild type Col-0 plants. Stomatal closure  
71 induced by changing CO<sub>2</sub> from 100 to 400 ppm had the slowest reaction kinetics (rate constant  
72  $k = 0,026 \text{ min}^{-1}$ ) and 400 to 800 ppm closure had the fastest reaction kinetics ( $k = 0.062 \text{ min}^{-1}$ ,  
73 Figure 1a). Stomatal closure induced by 100 to 800 ppm CO<sub>2</sub> transition is a mixture of 100 to  
74 400 ppm and 400 and 800 ppm responses as also reflected in its intermediate reaction kinetics  
75 ( $k = 0.038 \text{ min}^{-1}$ , Figure 1b). The clearly different kinetics of these CO<sub>2</sub> responses suggest that  
76 underlying mechanisms could be regulated by different components.

77 To address the underlying mechanisms of CO<sub>2</sub>-induced stomatal closure at different CO<sub>2</sub>  
78 transitions we studied plants deficient either in guard cell anion channel SLAC1 and its  
79 activation (*slac1-3*, *ghr1-3*, *ost1-3*) or in the CO<sub>2</sub>-specific stomatal signalling branch regulated

80 by MPK12 and HT1 kinases (*mpk12-4*, *ht1-2*, *ht1-8D*) and carbonic anhydrases CA1 and CA4  
81 (*cal ca4*) that convert CO<sub>2</sub> to bicarbonate. All studied mutants, except *ht1-2*, opened stomata  
82 at CO<sub>2</sub> transition from 400 to 100 ppm, although the responses of *ht1-8D*, *mpk12-4* and *calca4*  
83 mutants were slower and smaller in magnitude compared to wild-type plants, as described  
84 before<sup>22-25</sup> (Figure 2a, f and Figure 3a, d). The 100-400 and 400-800 [CO<sub>2</sub>] transitions revealed  
85 differences in sub-ambient and above-ambient CO<sub>2</sub>-induced stomatal closure responses  
86 between SLAC1 and related mutants and plants deficient in CO<sub>2</sub>-specific branch of stomatal  
87 signalling. We discuss these differences in terms of how fast stomata closed (k-values of fitted  
88 exponential functions, where appropriate) and what was the magnitude of response (reduction  
89 of stomatal conductance in absolute units).

90 In response to the 100-400 transition, the *slac1-3* and *ghr1-3* mutants closed their stomata with  
91 relatively fast exponential kinetics (Figure 2a); although the response was slower than in wild-  
92 type (Figure 2b), it was similar to wild-type in magnitude for *slac1-3* and close to that in *ghr1-3*  
93 (Figure 2c), indicating that SLAC1 and GHR1 are not of major importance in CO<sub>2</sub>-induced  
94 stomatal closure at sub-ambient 100-400 CO<sub>2</sub> shifts. On the other hand, both SLAC1 and GHR1  
95 were crucial for stomatal response to above-ambient CO<sub>2</sub> levels: *slac1-3* had slow, linear  
96 closure response of small magnitude and although *ghr1-3* had relatively fast closure response  
97 to the 400-800 transition, it was very low in magnitude (Figure 2a, d, e). The *ost1-3* mutant  
98 showed slow, linear response to both 100-400 and 400-800 transitions, indicating a regulatory  
99 role for the OST1 kinase in stomatal CO<sub>2</sub>-responses across varying CO<sub>2</sub> concentration ranges.  
100 As SLAC1 is not the sole substrate of the OST1 kinase<sup>28</sup>, it is likely that other OST1 targets are  
101 involved in CO<sub>2</sub>-induced stomatal closure at sub-ambient CO<sub>2</sub> levels.

102 All the CO<sub>2</sub>-signalling mutants, except *mpk12-4*, showed either no response (*ht1-2*, *ht1-8D*) or  
103 slow response with linear kinetics and small magnitude (*calca4*) in response to 100-400  
104 transition (Figure 2f, h). The response of *mpk12-4* to the 100-400 transition was exponential  
105 but significantly reduced in magnitude (Figure 2f-h). To the 400-800 transition, *ht1* mutants  
106 were again unresponsive, whereas *mpk12-4* and *calca4* plants closed their stomata with  
107 exponential kinetics; their closure response was slower than in wild-type, but larger in  
108 magnitude (Figure 2f, i, j). Together, these data suggest that HT1 is crucial to initiate stomatal  
109 closure in response to CO<sub>2</sub> irrespective of CO<sub>2</sub> levels, whereas MPK12 function is more  
110 important at sub-ambient CO<sub>2</sub> concentrations. The carbonic anhydrases are needed at sub-  
111 ambient CO<sub>2</sub> levels to ensure fast stomatal closure in response to CO<sub>2</sub> elevation, whereas their  
112 role becomes less important in the 400-800 transition. This may be explained by increased  
113 nonenzymatic bicarbonate formation at higher CO<sub>2</sub> levels, rendering carbonic anhydrases less  
114 important.

115 In experiments where CO<sub>2</sub> concentrations were changed directly from 100 ppm to 800 ppm, the  
116 differences in responses that were detected for 100-400 and 400-800 transitions shown in Figure  
117 2, were masked (Figure 3). Both *slac1-3* and *ost1-3* showed similar slow, non-exponential  
118 stomatal closure, whereas *ghr1-3* plants closed stomata as fast as wild-type plants but to a lower  
119 magnitude that was comparable with *slac1-3* and *ost1-3* (Figure 3a-c). Thus, by such an  
120 experimental set-up the important role for SLAC1 and GHR1 specifically in above-ambient  
121 CO<sub>2</sub>-induced stomatal closure was not clear. The *ht1* mutants were insensitive to CO<sub>2</sub> shift from

122 100 to 800, as expected, whereas *mpk12-4* mutants had slower response of smaller magnitude  
123 compared to wild-type plants (Figure 3d-f). The *calca4* mutants closed stomata slower but to  
124 the same extent as wild-type plants (Figure 3d-f). Thus, this experimental set-up did not allow  
125 to detect a more prominent role for MPK12 and carbonic anhydrases at sub-ambient CO<sub>2</sub> levels  
126 that was clear from experiments addressing the 100-400 and 400-800 transitions separately  
127 (Figure 2). In many cases the stomatal response to CO<sub>2</sub> elevation is studied by increasing CO<sub>2</sub>  
128 concentration from sub-ambient to above-ambient levels. Our experiments indicate that this can  
129 confound the interpretation of the results; and highlight the importance of experimental set-up,  
130 when studying and trying to understand the molecular mechanisms of stomatal response to  
131 elevated CO<sub>2</sub> concentration.

132 Here we show that stomatal closure in response to an increase in CO<sub>2</sub> concentration, which  
133 occurs both at sub-ambient and above-ambient CO<sub>2</sub> concentration ranges, comprises two  
134 different underlying processes. The CO<sub>2</sub>-induced stomatal closure at a transition from ambient  
135 to above-ambient CO<sub>2</sub> levels displays fastest reaction kinetics and requires the activation of  
136 guard cell anion channel SLAC1 (Figure 2a-e), just like the ABA signal transduction  
137 pathway<sup>16,18</sup>. Conversely, the CO<sub>2</sub> specific carbonic anhydrases and the MPK12-HT1 signalling  
138 pathway have a major role when CO<sub>2</sub> levels change in the sub-ambient range (Figure 2f-j),  
139 albeit they also contribute to above-ambient CO<sub>2</sub>-induced stomatal closure<sup>22-24,27</sup>.

140 The mechanisms of CO<sub>2</sub>-responses in the sub-ambient range of CO<sub>2</sub> concentrations, including  
141 stomatal opening response at low CO<sub>2</sub> levels, remain largely uncharacterised. During active  
142 photosynthesis, CO<sub>2</sub> concentrations in the intercellular air spaces, where CO<sub>2</sub> is perceived by  
143 the plant<sup>29</sup>, are below ambient. Therefore, adequate and efficient responsiveness of plant  
144 stomata in this CO<sub>2</sub> concentration range is especially important to maximise photosynthetic  
145 efficiency. On the other hand, in the context of increasing global CO<sub>2</sub> levels and changing  
146 climate, understanding the molecular mechanisms of CO<sub>2</sub>-induced stomatal closure, when CO<sub>2</sub>  
147 concentration rises above the current ambient levels, is of special interest. From the perspective  
148 of breeding water use efficient, but productive crops for the future climates, it is important to  
149 clearly define and differentiate the distinct processes underlying stomatal responses to CO<sub>2</sub>, and  
150 to study them by experimental approaches that help to disentangle their molecular mechanisms.

## 151 **Methods**

### 152 ***Plant lines and growth conditions***

153 *Arabidopsis thaliana* accession Col-0 and the following mutants in the same genetic  
154 background were used for experiments: *slac1-3*<sup>16</sup>, *ost1-3*<sup>30</sup>, *ghr1-3*<sup>15</sup>, *ht1-2*<sup>25</sup>, *ht1-8D*<sup>22</sup>, *mpk12-*  
155 *4*<sup>24</sup>, *calca4*<sup>23</sup>. Plants were grown in 4:2:3 v/v peat:vermiculite:water mixture at 12/12  
156 photoperiod with 150 μmol m<sup>-2</sup> s<sup>-1</sup> light in controlled-environment growth cabinets (AR-66LX;  
157 Percival Scientific; MCA1600, Snijders Scientific) at 70% relative humidity and day-time  
158 temperature of 23°C and night-time temperature 18°C. Plant age at experiment time was ~25  
159 days.

### 160 ***Gas-exchange measurements***

161 Measurements of stomatal conductance were carried out with a temperature-controlled custom-  
162 built gas-exchange device<sup>3,31</sup>. Plants were inserted into measurement cuvettes and allowed to  
163 acclimate for 1-2 hours at ~70% relative humidity, 24°C air temperature and 400 ppm CO<sub>2</sub>.  
164 When stomatal conductance had stabilised, CO<sub>2</sub> concentration was reduced to 100 ppm for 2  
165 hours. Thereafter, CO<sub>2</sub> concentration was either increased to 400 ppm and then to 800 ppm or  
166 directly from 100 ppm to 800 ppm; stomatal conductances were followed for 2 hours in each  
167 condition (Figure 1).

## 168 **Data analysis**

169 Magnitude of stomatal closure response was calculated as the difference in stomatal  
170 conductance between last time point before treatment and at the end of 2 hours of treatment at  
171 a given CO<sub>2</sub> level. Response curves were classified as exponential and non-exponential, the  
172 latter mostly comprising linear response curves. Response rate constants (k-values) were  
173 calculated by fitting exponential functions to response curves that behaved exponentially with  
174 GraphPad Prism 8.0.1. One-way ANOVA with Tukey *post hoc* test was used for statistical  
175 analysis as indicated in the figure legends,  $p < 0.05$  were considered statistically significant.  
176 Statistical analyses were carried out with Past 4.0<sup>32</sup>.

## 177 **References**

- 178 1. Ainsworth, E. A. & Long, S. P. 30 years of free-air carbon dioxide enrichment (FACE):  
179 What have we learned about future crop productivity and its potential for adaptation?  
180 *Glob. Change Biol.* **27**, 27–49 (2021).
- 181 2. Franks, P. J. & Britton-Harper, Z. J. No evidence of general CO<sub>2</sub> insensitivity in ferns:  
182 one stomatal control mechanism for all land plants? *New Phytol.* **211**, 819–827 (2016).
- 183 3. Hōrak, H., Kollist, H. & Merilo, E. Fern Stomatal Responses to ABA and CO<sub>2</sub> Depend on  
184 Species and Growth Conditions. *Plant Physiol.* **174**, 672–679 (2017).
- 185 4. Azoulay-Shemer, T. *et al.* Guard cell photosynthesis is critical for stomatal turgor  
186 production, yet does not directly mediate CO<sub>2</sub>- and ABA-induced stomatal closing. *Plant*  
187 *J.* **83**, 567–581 (2015).
- 188 5. Chater, C. *et al.* Elevated CO<sub>2</sub>-Induced Responses in Stomata Require ABA and ABA  
189 Signaling. *Curr. Biol.* **25**, 2709–2716 (2015).
- 190 6. Brodribb, T. J., McAdam, S. A. M., Jordan, G. J. & Feild, T. S. Evolution of stomatal  
191 responsiveness to CO<sub>2</sub> and optimization of water-use efficiency among land plants. *New*  
192 *Phytol.* **183**, 839–847 (2009).
- 193 7. Ma, Y. *et al.* Regulators of PP2C Phosphatase Activity Function as Abscisic Acid  
194 Sensors. *Science* **324**, 1064–1068 (2009).
- 195 8. Park, S.-Y. *et al.* Abscisic Acid Inhibits Type 2C Protein Phosphatases via the PYR/PYL  
196 Family of START Proteins. *Science* **324**, 1068–1071 (2009).
- 197 9. Melcher, K. *et al.* A gate–latch–lock mechanism for hormone signalling by abscisic acid  
198 receptors. *Nature* **462**, 602–608 (2009).
- 199 10. Mustilli, A.-C., Merlot, S., Vavasseur, A., Fenzi, F. & Giraudat, J. Arabidopsis OST1  
200 Protein Kinase Mediates the Regulation of Stomatal Aperture by Abscisic Acid and Acts  
201 Upstream of Reactive Oxygen Species Production. *Plant Cell* **14**, 3089–3099 (2002).
- 202 11. Fujii, H. *et al.* *In vitro* Reconstitution of an ABA Signaling Pathway. *Nature* **462**, 660–  
203 664 (2009).
- 204 12. Geiger, D. *et al.* Activity of guard cell anion channel SLAC1 is controlled by drought-  
205 stress signaling kinase-phosphatase pair. *Proc. Natl. Acad. Sci.* **106**, 21425–21430 (2009).

- 206 13. Lee, S. C., Lan, W., Buchanan, B. B. & Luan, S. A protein kinase-phosphatase pair  
207 interacts with an ion channel to regulate ABA signaling in plant guard cells. *Proc. Natl.*  
208 *Acad. Sci.* **106**, 21419–21424 (2009).
- 209 14. Hua, D. *et al.* A Plasma Membrane Receptor Kinase, GHR1, Mediates Abscisic Acid- and  
210 Hydrogen Peroxide-Regulated Stomatal Movement in *Arabidopsis*. *Plant Cell Online* **24**,  
211 2546–2561 (2012).
- 212 15. Sierla, M. *et al.* The Receptor-like Pseudokinase GHR1 Is Required for Stomatal Closure.  
213 *Plant Cell* **30**, 2813–2837 (2018).
- 214 16. Vahisalu, T. *et al.* SLAC1 is required for plant guard cell S-type anion channel function in  
215 stomatal signalling. *Nature* **452**, 487–491 (2008).
- 216 17. Vahisalu, T. *et al.* Ozone-triggered rapid stomatal response involves the production of  
217 reactive oxygen species, and is controlled by SLAC1 and OST1. *Plant J.* **62**, 442–453  
218 (2010).
- 219 18. Negi, J. *et al.* CO<sub>2</sub> regulator SLAC1 and its homologues are essential for anion  
220 homeostasis in plant cells. *Nature* **452**, 483–486 (2008).
- 221 19. Merilo, E. *et al.* PYR/RCAR Receptors Contribute to Ozone-, Reduced Air Humidity-,  
222 Darkness-, and CO<sub>2</sub>-Induced Stomatal Regulation. *Plant Physiol.* **162**, 1652–1668 (2013).
- 223 20. Dittrich, M. *et al.* The role of *Arabidopsis* ABA receptors from the PYR/PYL/RCAR  
224 family in stomatal acclimation and closure signal integration. *Nat. Plants* **5**, 1002–1011  
225 (2019).
- 226 21. Xue, S. *et al.* Central functions of bicarbonate in S-type anion channel activation and  
227 OST1 protein kinase in CO<sub>2</sub> signal transduction in guard cell. *EMBO J.* **30**, 1645–1658  
228 (2011).
- 229 22. Hōrak, H. *et al.* A Dominant Mutation in the HT1 Kinase Uncovers Roles of MAP  
230 Kinases and GHR1 in CO<sub>2</sub>-Induced Stomatal Closure. *Plant Cell* **28**, 2493–2509 (2016).
- 231 23. Hu, H. *et al.* Carbonic anhydrases are upstream regulators of CO<sub>2</sub>-controlled stomatal  
232 movements in guard cells. *Nat. Cell Biol.* **12**, 87–93 (2010).
- 233 24. Jakobson, L. *et al.* Natural Variation in *Arabidopsis* Cvi-0 Accession Reveals an  
234 Important Role of MPK12 in Guard Cell CO<sub>2</sub> Signaling. *PLOS Biol.* **14**, e2000322  
235 (2016).
- 236 25. Hashimoto, M. *et al.* *Arabidopsis* HT1 kinase controls stomatal movements in response to  
237 CO<sub>2</sub>. *Nat. Cell Biol.* **8**, 391–397 (2006).
- 238 26. Hashimoto-Sugimoto, M. *et al.* Dominant and recessive mutations in the Raf-like kinase  
239 *HT1* gene completely disrupt stomatal responses to CO<sub>2</sub> in *Arabidopsis*. *J. Exp. Bot.* **67**,  
240 3251–3261 (2016).
- 241 27. Töldsepp, K. *et al.* Mitogen-activated protein kinases MPK4 and MPK12 are key  
242 components mediating CO<sub>2</sub>-induced stomatal movements. *Plant J.* **96**, 1018–1035  
243 (2018).
- 244 28. Wang, P. *et al.* Mapping proteome-wide targets of protein kinases in plant stress  
245 responses. *Proc. Natl. Acad. Sci.* (2020) doi:10.1073/pnas.1919901117.
- 246 29. Mott, K. A. Do Stomata Respond to CO<sub>2</sub> Concentrations Other than Intercellular? *Plant*  
247 *Physiol.* **86**, 200–203 (1988).
- 248 30. Yoshida, R. *et al.* ABA-Activated SnRK2 Protein Kinase is Required for Dehydration  
249 Stress Signaling in *Arabidopsis*. *Plant Cell Physiol.* **43**, 1473–1483 (2002).
- 250 31. Kollist, T. *et al.* A novel device detects a rapid ozone-induced transient stomatal closure  
251 in intact *Arabidopsis* and its absence in *abi2* mutant. *Physiol. Plant.* **129**, 796–803 (2007).
- 252 32. Hammer, O., Harper, D. A. T. & Ryan, P. D. PAST: Paleontological Statistics Software  
253 Package for Education and Data Analysis. *Palaeontol. Electron.* **4**, 10 (2001).
- 254

256

## 257 **Acknowledgements**

258 This work was supported by the Estonian Research Council grants PSG404 to H.H., Basic  
259 funding from the Institute of Technology and PRG719 to E.M. and PRG433 to H.K.; and  
260 European Regional Development Fund via Center of Excellence in Molecular Cell Engineering.

## 261 **Author Contributions**

262 H.H. designed the study, H.H., K.K. and E.M. performed experiments, H.H., K.K., E.M. and  
263 H.K. analysed data, H.H. and H.K. wrote the manuscript, all authors commented, edited and  
264 approved the final manuscript.

## 265 **Competing Interests statement**

266 The authors declare no competing interests.

## 267 **Figure Legends**

### 268 **Figure 1. Kinetics of CO<sub>2</sub>-induced stomatal closure in wild-type Arabidopsis.**

269 Col-0 wild-type Arabidopsis stomatal response to elevation of CO<sub>2</sub> concentration (a) from 100  
270 to 400 ppm and 400 to 800 ppm, (b) and from 100 to 800 ppm. Fitted k-values (rate constant)  
271 with 95% confidence intervals are shown next to respective response curves. Mean stomatal  
272 conductance  $\pm$  SEM is shown. Sample size was 17 in (a) and 14 in (b).

### 273 **Figure 2. Stomatal responses to CO<sub>2</sub> concentration elevation from 100 to 400 ppm and 274 400 to 800 ppm are mediated by different regulators.**

275 (a) and (f) Stomatal response to CO<sub>2</sub> concentration elevation from 100 to 400 ppm and 400 to  
276 800 ppm, mean stomatal conductance  $\pm$  SEM is shown. (b, g) and (d, i) Boxplot of fitted k-  
277 values (rate constants) of stomatal response to CO<sub>2</sub> concentration elevation from 100 to 400  
278 ppm and 400 to 800 ppm respectively, linear responses are marked as NA (not applicable). (c,  
279 h) and (e, j) Boxplot of absolute stomatal closure (mmol m<sup>-2</sup> s<sup>-1</sup>) in response to CO<sub>2</sub>  
280 concentration elevation from 100 to 400 ppm and 400 to 800 ppm respectively. (b-i) and (g-j)  
281 Boxes represent 25-75 % quartiles and median as the horizontal line inside, whiskers indicate  
282 the smallest and largest values, points show individual plant values. Statistically significantly  
283 different groups are marked with different letters (One-way ANOVA with Tukey *post hoc* test).  
284 (a-j) Sample size was 17 for Col-0 and *ost1-3*; 7 for *ht1-2* and *ht1-8D*; 16 for *ghr1-3* and *slac1-*  
285 *3*, 10 for *calca4* and 12 for *mpk12-4*.

### 286 **Figure 3. Analysing stomatal response to CO<sub>2</sub>-elevation from sub-ambient to above- 287 ambient CO<sub>2</sub> levels masks underlying mechanisms.**

288 (a) and (d) Stomatal responses to CO<sub>2</sub> concentration elevation from 100 to 800 ppm, mean  
289 stomatal conductance  $\pm$  SEM is shown. (b) and (e) Boxplot of k-values (rate constants) during  
290 stomatal response to CO<sub>2</sub> concentration elevation from 100 to 800 ppm, linear responses are  
291 marked as NA (not applicable). (c) and (f) Boxplot of absolute stomatal closure (mmol m<sup>-2</sup> s<sup>-1</sup>)

292 in response to CO<sub>2</sub> concentration elevation from 100 to 800 ppm. **(b, c, e, f)** Boxes represent  
293 25-75 % quartiles and the median as horizontal line inside, whiskers indicate the smallest and  
294 largest values, points show individual plant values. Statistically significantly different groups  
295 are marked with different letters (One-way ANOVA with Tukey *post hoc* test). **(a-f)** Sample  
296 size was 14 for Col-0; 6 for *ht1-2*; 7 for *ht1-8D*; 8 for *ghr1-3*, *mpk12-4* and *ost1-3*; 9 for *slac1-*  
297 *3* and *calca4*.



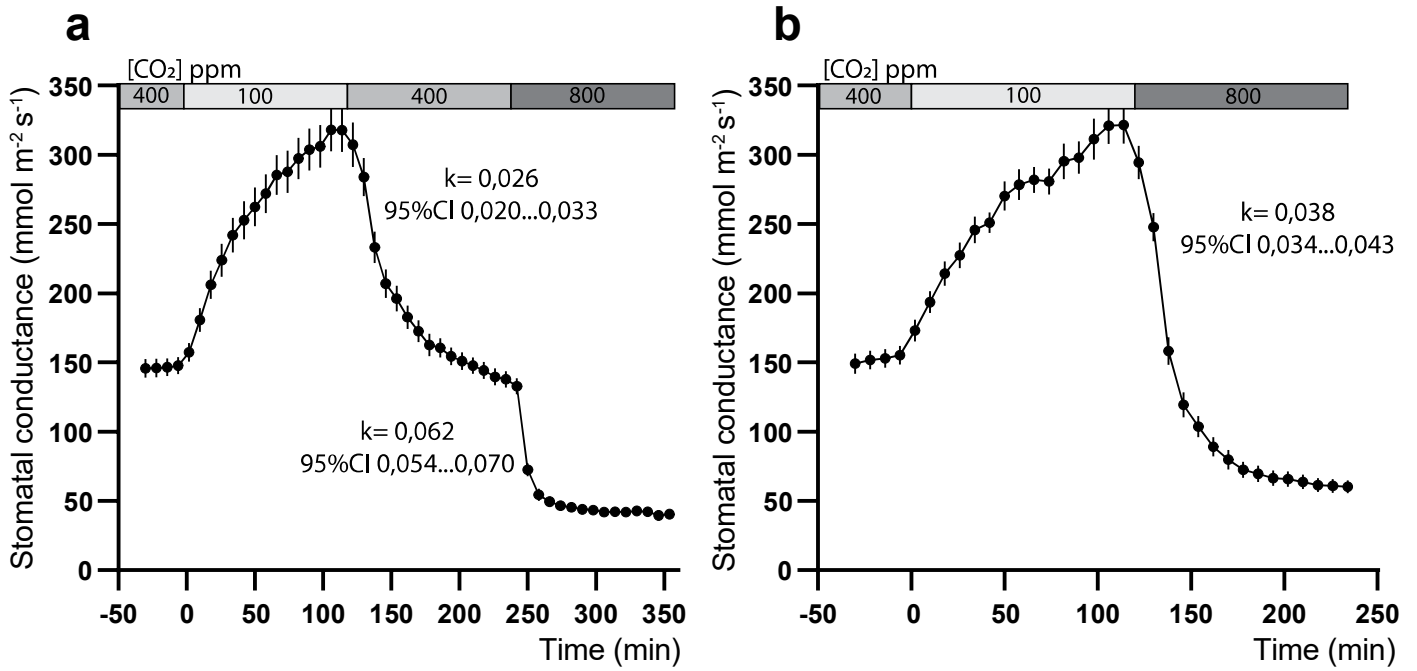

**Figure 1. Kinetics of CO<sub>2</sub>-induced stomatal closure in wild-type Arabidopsis.**

Col-0 wild-type Arabidopsis stomatal response to elevation of CO<sub>2</sub> concentration (a) from 100 to 400 ppm and 400 to 800 ppm, (b) and from 100 to 800 ppm. Fitted k-values (rate constant) with 95% confidence intervals are shown next to respective response curves. Mean stomatal conductance  $\pm$  SEM is shown. Sample size was 17 in (a) and 14 in (b).

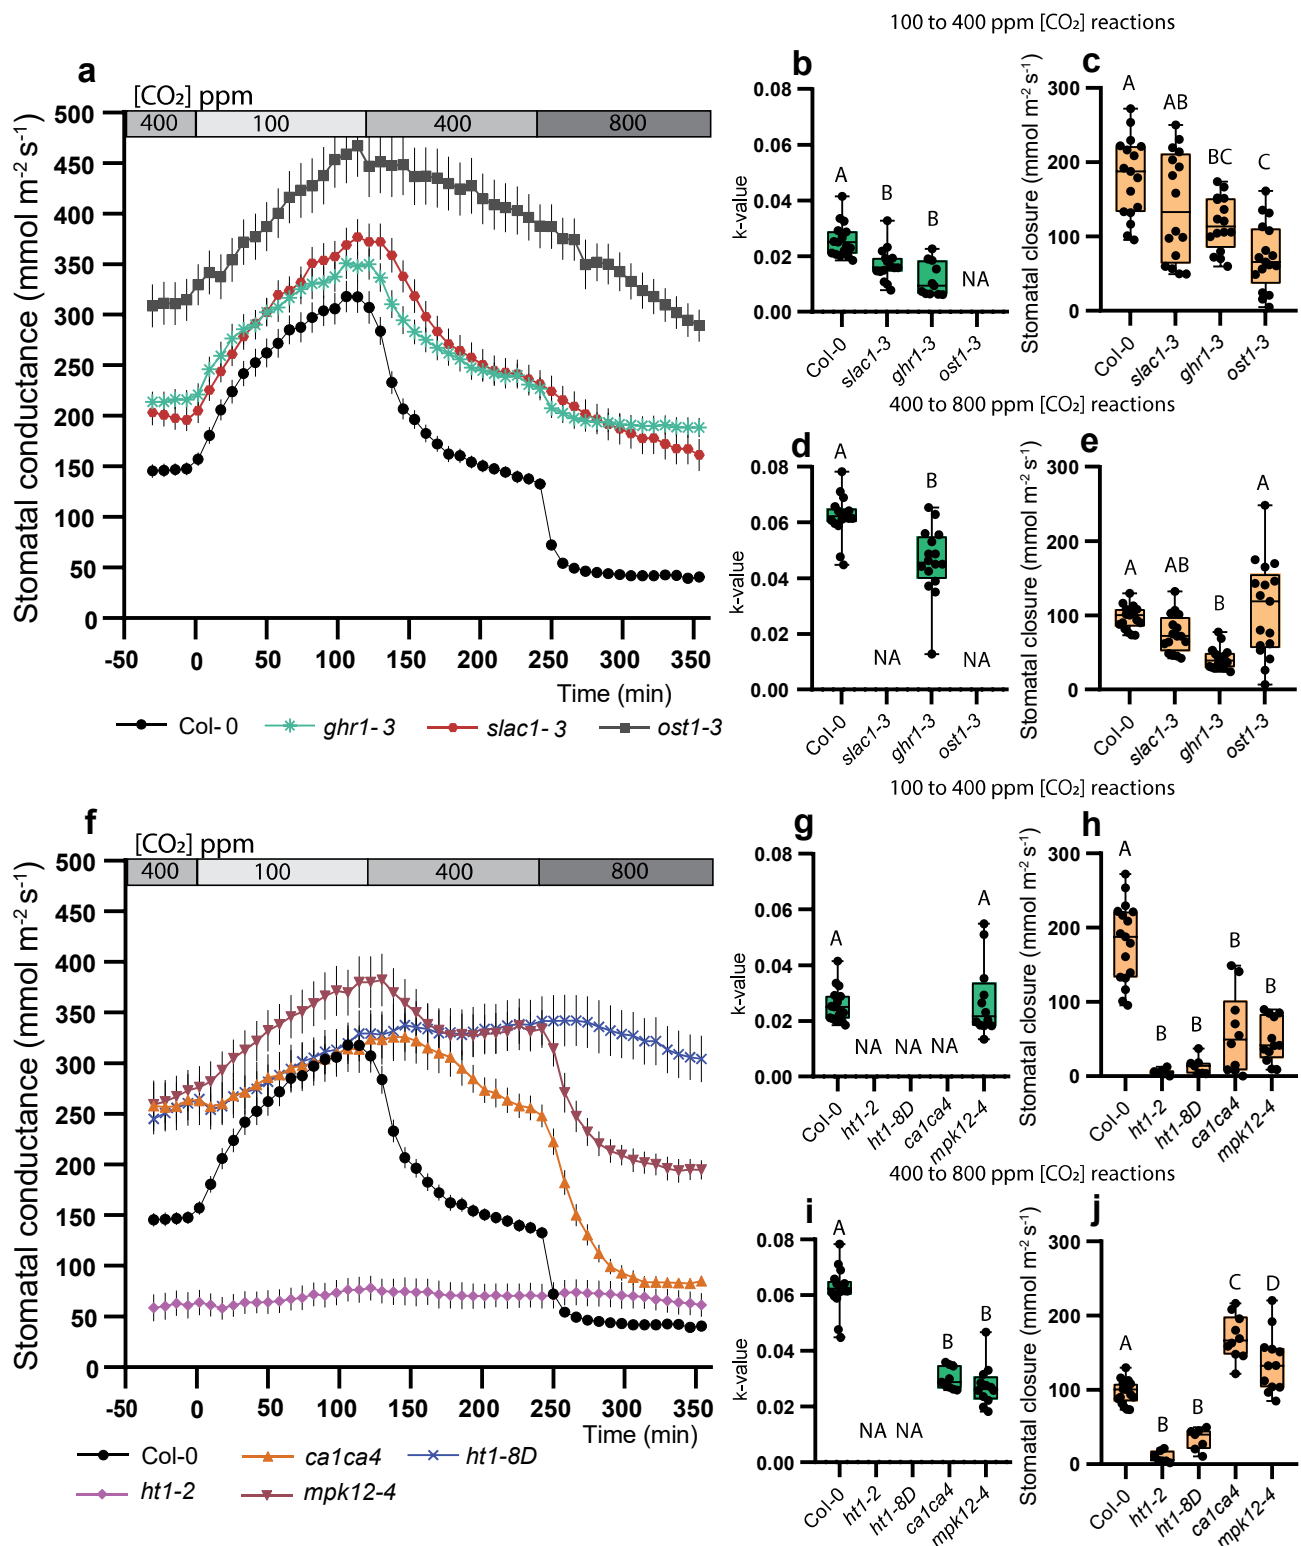

**Figure 2. Stomatal responses to CO<sub>2</sub> concentration elevation from 100 to 400 ppm and 400 to 800 ppm are mediated by different regulators.**

(a) and (f) Stomatal response to CO<sub>2</sub> concentration elevation from 100 to 400 ppm and 400 to 800 ppm, mean stomatal conductance ± SEM is shown. (b, g) and (d, i) Boxplot of fitted k-values (rate constants) of stomatal response to CO<sub>2</sub> concentration elevation from 100 to 400 ppm and 400 to 800 ppm respectively, linear responses are marked as NA (not applicable). (c, h) and (e, j) Boxplot of absolute stomatal closure (mmol m<sup>-2</sup> s<sup>-1</sup>) in response to CO<sub>2</sub> concentration elevation from 100 to 400 ppm and 400 to 800 ppm respectively. (b-i) and (g-j) Boxes represent 25-75% quartiles and median as the horizontal line inside, whiskers indicate the smallest and largest values, points show individual plant values. Statistically significantly different groups are marked with different letters (One-way ANOVA with Tukey *post hoc* test). (a-j) Sample size was 17 for Col-0 and *ost1-3*; 7 for *ht1-2* and *ht1-8D*; 16 for *ghr1-3* and *slac1-3*, 10 for *ca1ca4* and 12 for *mpk12-4*.

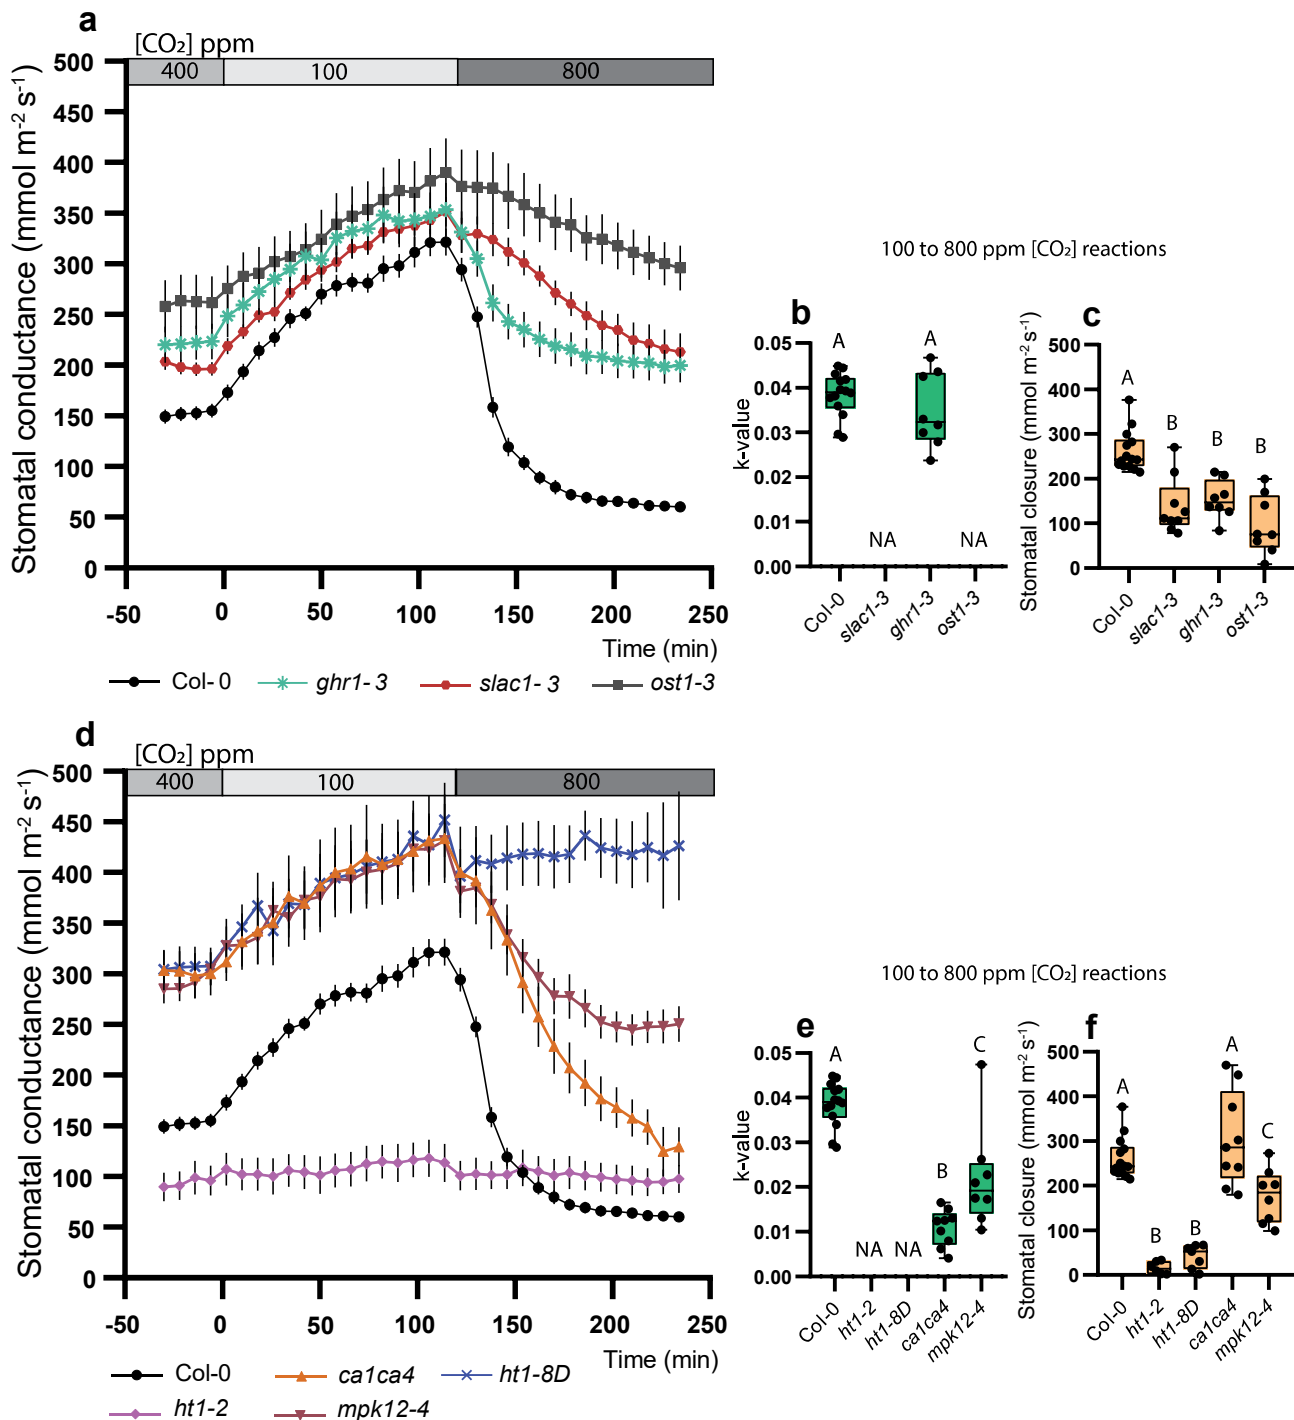

**Figure 3. Analysing stomatal response to CO<sub>2</sub>-elevation from sub-ambient to above-ambient CO<sub>2</sub> levels masks underlying mechanisms.**

(a) and (d) Stomatal responses to CO<sub>2</sub> concentration elevation from 100 to 800 ppm, mean stomatal conductance ± SEM is shown. (b) and (e) Boxplot of k-values (rate constants) during stomatal response to CO<sub>2</sub> concentration elevation from 100 to 800 ppm, linear responses are marked as NA (not applicable). (c) and (f) Boxplot of absolute stomatal closure (mmol m<sup>-2</sup> s<sup>-1</sup>) in response to CO<sub>2</sub> concentration elevation from 100 to 800 ppm. (b, c, e, f) Boxes represent 25-75 % quartiles and the median as horizontal line inside, whiskers indicate the smallest and largest values, points show individual plant values. Statistically significantly different groups are marked with different letters (One-way ANOVA with Tukey *post hoc* test). (a-f) Sample size was 14 for Col-0; 6 for *ht1-2*; 7 for *ht1-8D*; 8 for *ghr1-3*, *mpk12-4* and *ost1-3*; 9 for *slac1-3* and *ca1ca4*.
